# Supplementary material for: The Visual Patient Avatar ICU Facilitates Information Transfer of Written Information by Visualization: A Multicenter Comparative Eye-Tracking Study
Source: MDPI journal article supplement (doi:10.3390/diagnostics13223432), 2023-11-12
Supplement: s1 [file s1]

# Visual Patient Intensive Care

Computer-based multicenter study

# Instructions

- Thank you very much for participating in this study!
- Main topic of our study group: new forms of presentation of medical parameters

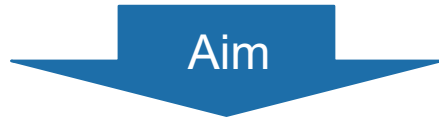

- Improving their perception
  - Improving situational awareness for possible changes
- Technique for vital sign presentation: "Visual Patient"
    - animated virtual model of the monitored patient

# Instructions

- Study: Comparison of two ways of displaying vital signs  
“Visual patient” vs. “conventional monitor”
- 1. Teachingvideo for the «Visual Patient»
- 2. Example of a «conventional monitor»
- 3. One by one: 10 monitor slides (15 seconds each)
  - 5x conventional design
  - 5x “Visual Patient”
- Try to remember as many vital signs and installations as possible
- Please answer the questions on the Ipad after each example

# Instructions

Table with the defined limit values

Defined limits of vital signs

| Parameter                  | Low VP | High VP | (Units)               |
|----------------------------|--------|---------|-----------------------|
| HR (ECG)                   | <55    | >100    | /min                  |
| Pulse                      | <55    | >100    | /min                  |
| ABP (Mean)                 | <65    | >100    | mmHg                  |
| NBP (Mean)                 | <65    | >100    | mmHg                  |
| CVP (Mean)                 | <4     | >12     | mmHg                  |
| STE                        | <-0.2  | >0.2    | mV                    |
| SpO2                       | <94    | none    | %                     |
| RR                         | <8     | >16     | /min                  |
| TV                         | <350   | >750    | ml                    |
| etCO2                      | <35    | >45     | mmHg                  |
| Tcore                      | <36.0  | ≥37.5   | °C                    |
| BIS                        | ≤60    | >60     | (-)                   |
| TOF rat.                   | <90    | ≥90     | %                     |
| CI                         | <2.5   | >4      | l/m <sup>2</sup> /min |
| Peak airway pressure (PIP) | <10    | >30     | mbar                  |
| Insp. O2                   | <40    | ≥80     | %                     |

# Introduction

- Teachingvideo «Visual patient»

# Introduction

- Example «conventional monitor»

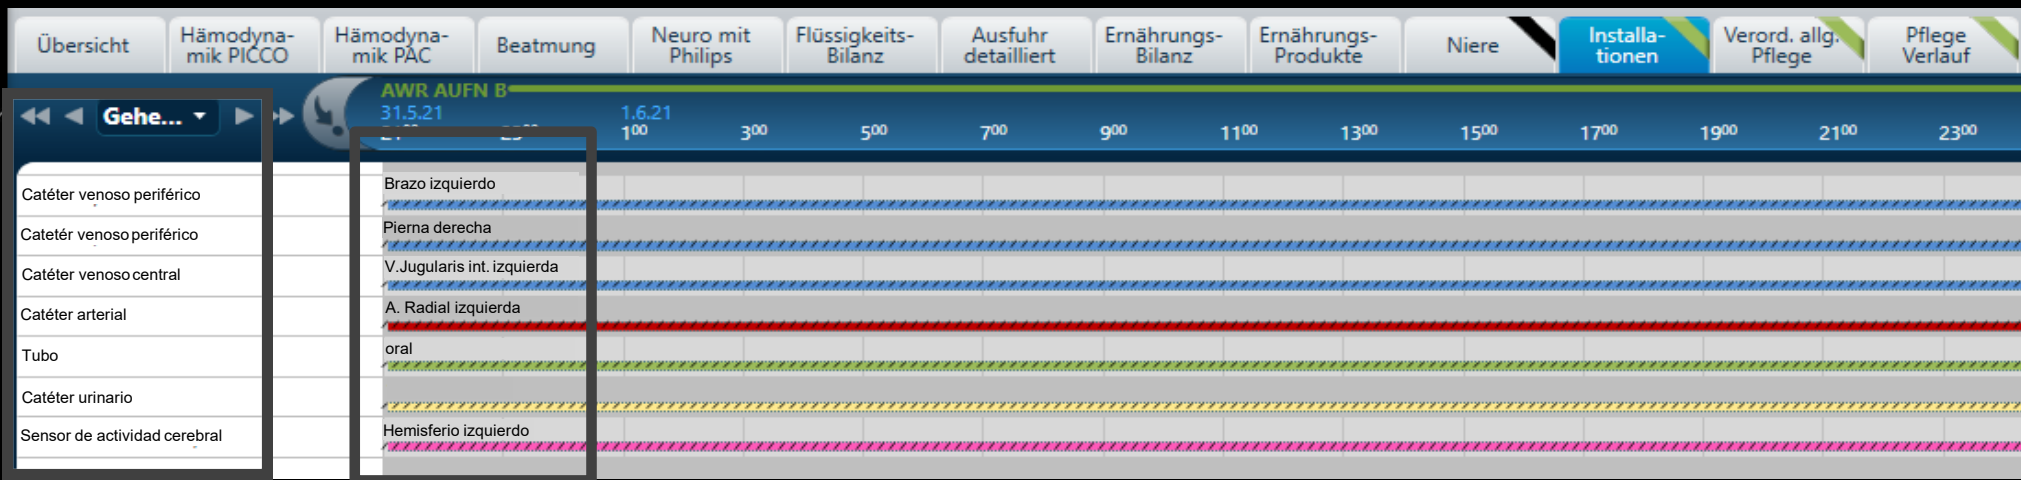

# Survey

[Back](#)[Next](#)

|                             | Too low               | Safe                  | Too high              | Not measured          | No recall             |
|-----------------------------|-----------------------|-----------------------|-----------------------|-----------------------|-----------------------|
| Heart rate (ECG)/ Puls rate | <input type="radio"/> |
| Arterial blood pressure     | <input type="radio"/> |
| Central venous pressure     | <input type="radio"/> |
| Respiratory rate            | <input type="radio"/> |
| Tidal volume                | <input type="radio"/> |
| EtCO2                       | <input type="radio"/> |
| Core body temperature       | <input type="radio"/> |
| Peak airway pressure        | <input type="radio"/> |
| Cardiac output (CI)         | <input type="radio"/> |

☐ Answer Required

1: Brain activity (BIS):

☐ Asleep

☐ Awake

☐ Not measured

☐ No recall

[Back](#)[Next](#)

\* 1: PiCCO:

☐ A. femoralis right

☐ A. femoralis left

☐ None

☐ No recall

☐ At least 1 answer required

\* 1: Airway device:

☐ Tube

☐ LAMA

☐ None

☐ No recall

☐ At least 1 answer required

\* 1: Urinary Catheter:

☐ At least 1 answer required

☐ None



# Survey

Back

Move Slider

Next

\* Please rate your confidence that you have correctly identified the vital signed deviations and the installations.

Confident

Very unconfident

Very confident

Testing

Back

Next

\* How much time pressure did you feel performing the task? (0 = no time pressure, 100 = very much time pressure)

50

Answer Required

\* How successful or satisfied did you feel upon the performance or completion of the given task? (0 = very successful, 100 = not successful)

50

Answer Required

\* How hard did you have to work (mentally) to accomplish your level of performance? (0 = no effort, 100 = very much effort)

50

Answer Required

\* How discouraged, stressed and annoyed vs. content did you feel during the task? (0 = very content, 100 = very insecure)

Answer Required

# Case 1

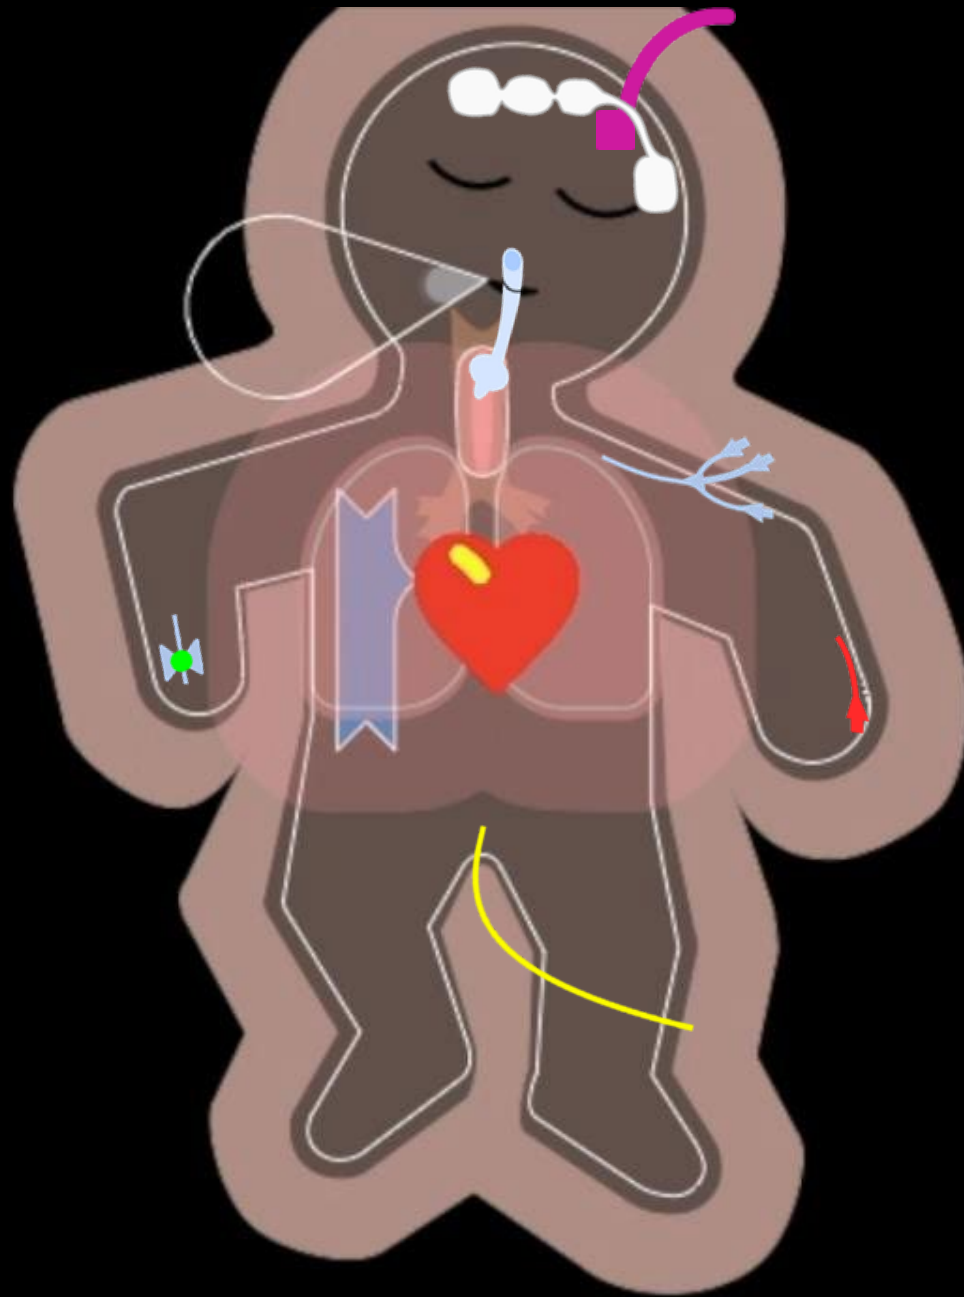

# Case 2

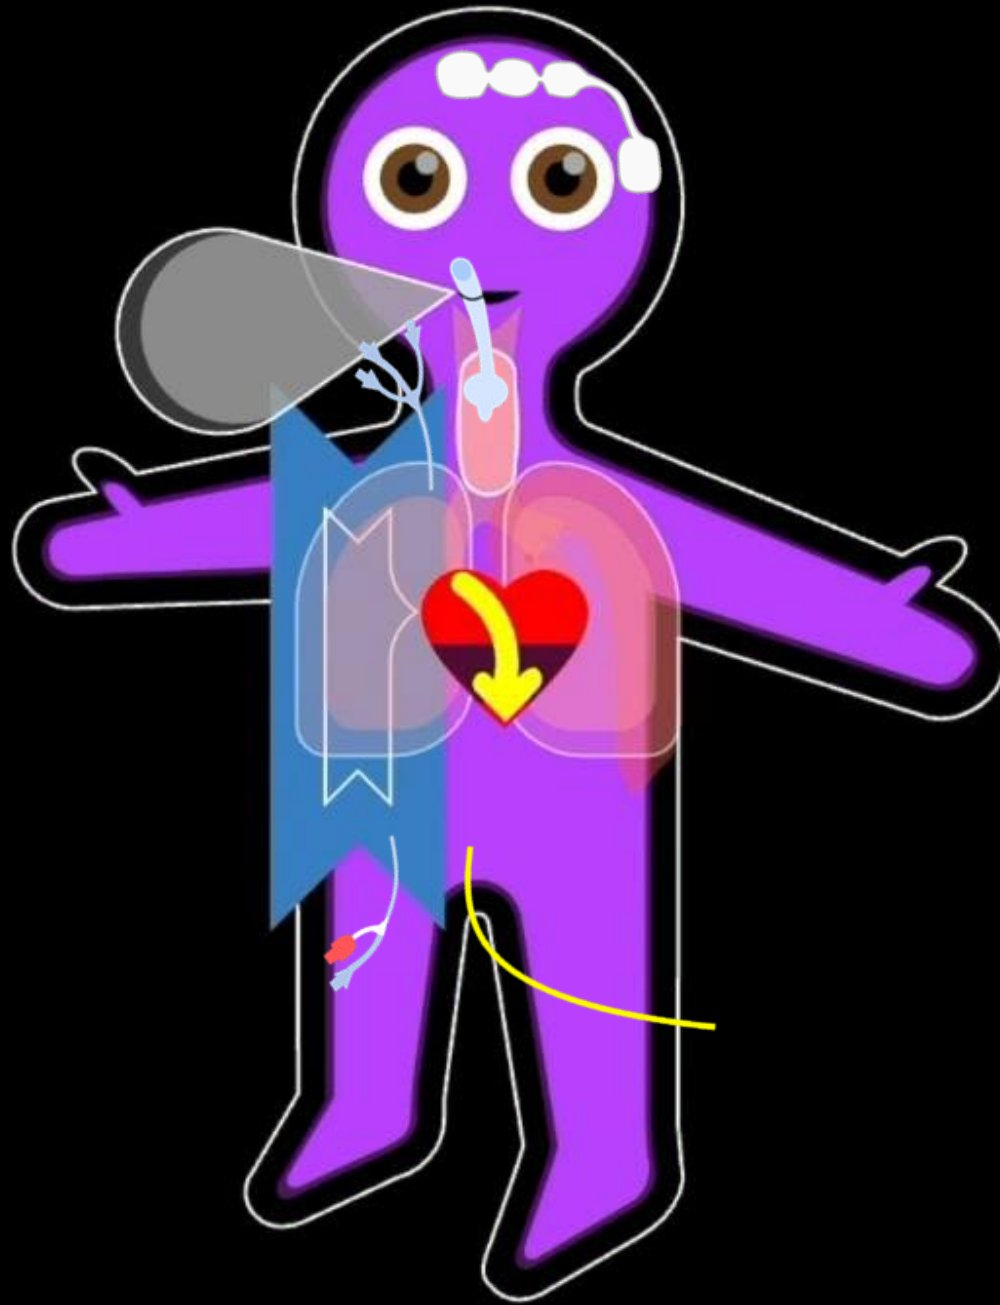

# Case 3

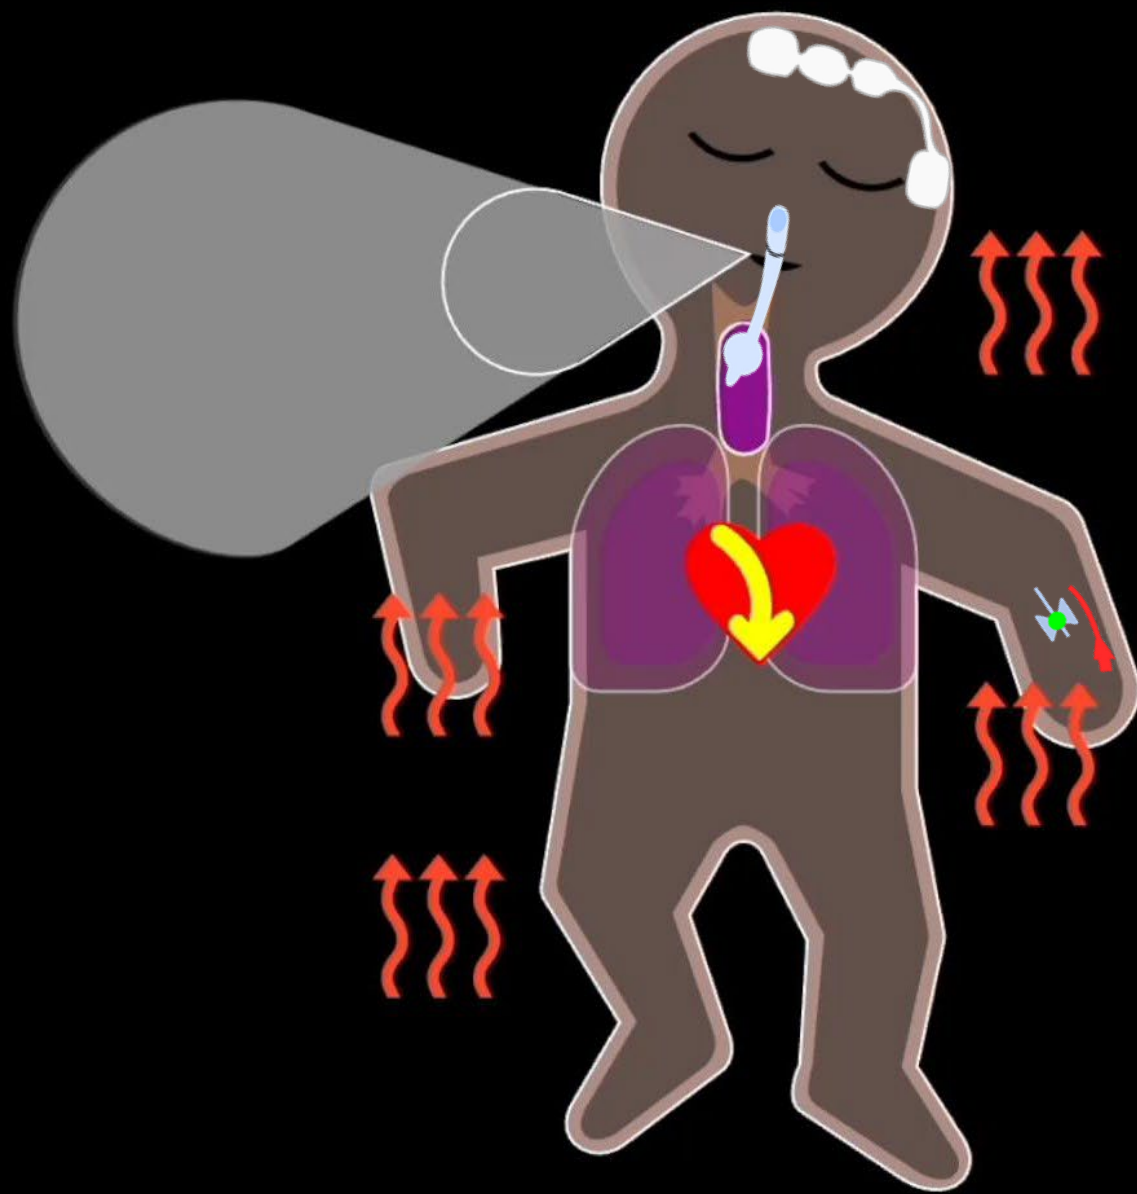

# Case 4



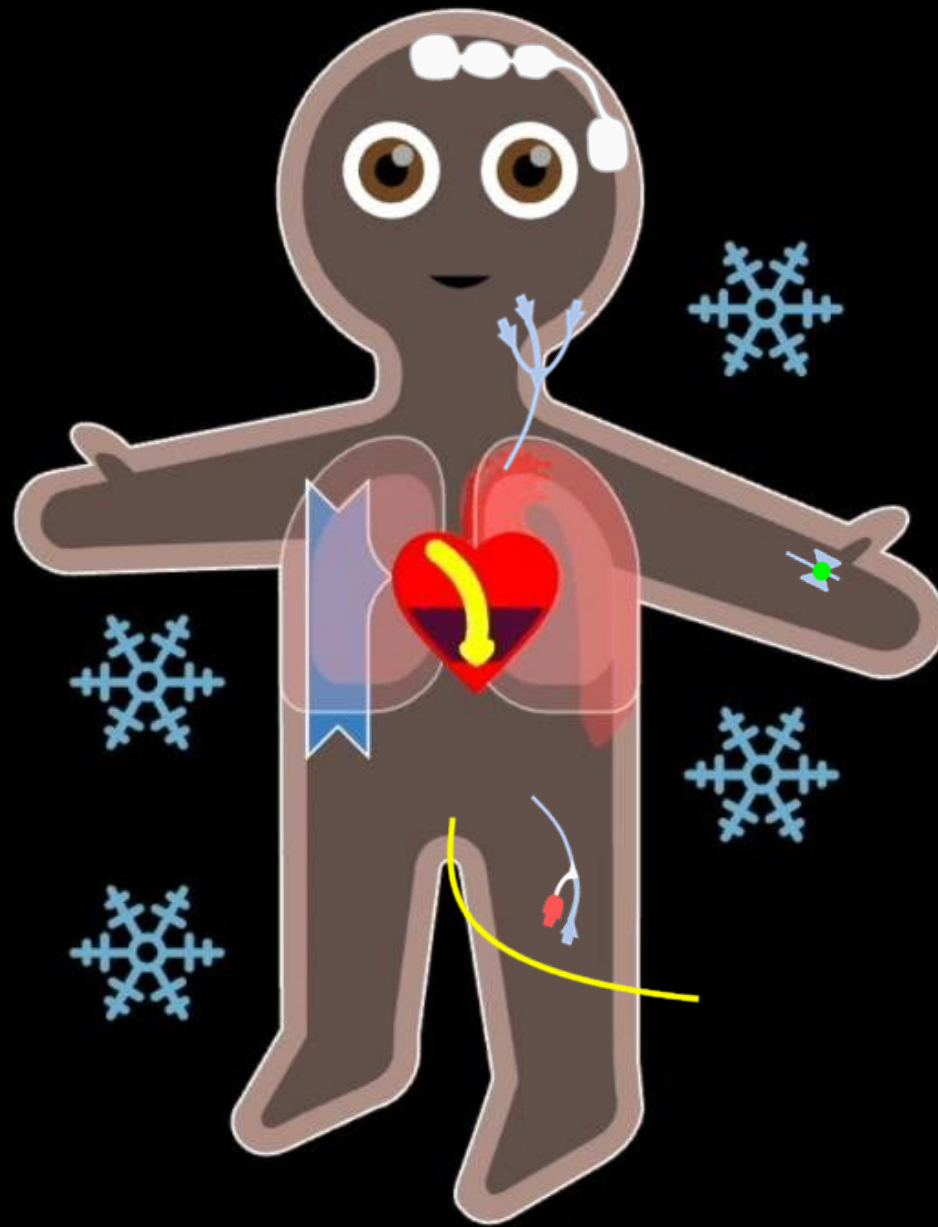

# Case 5

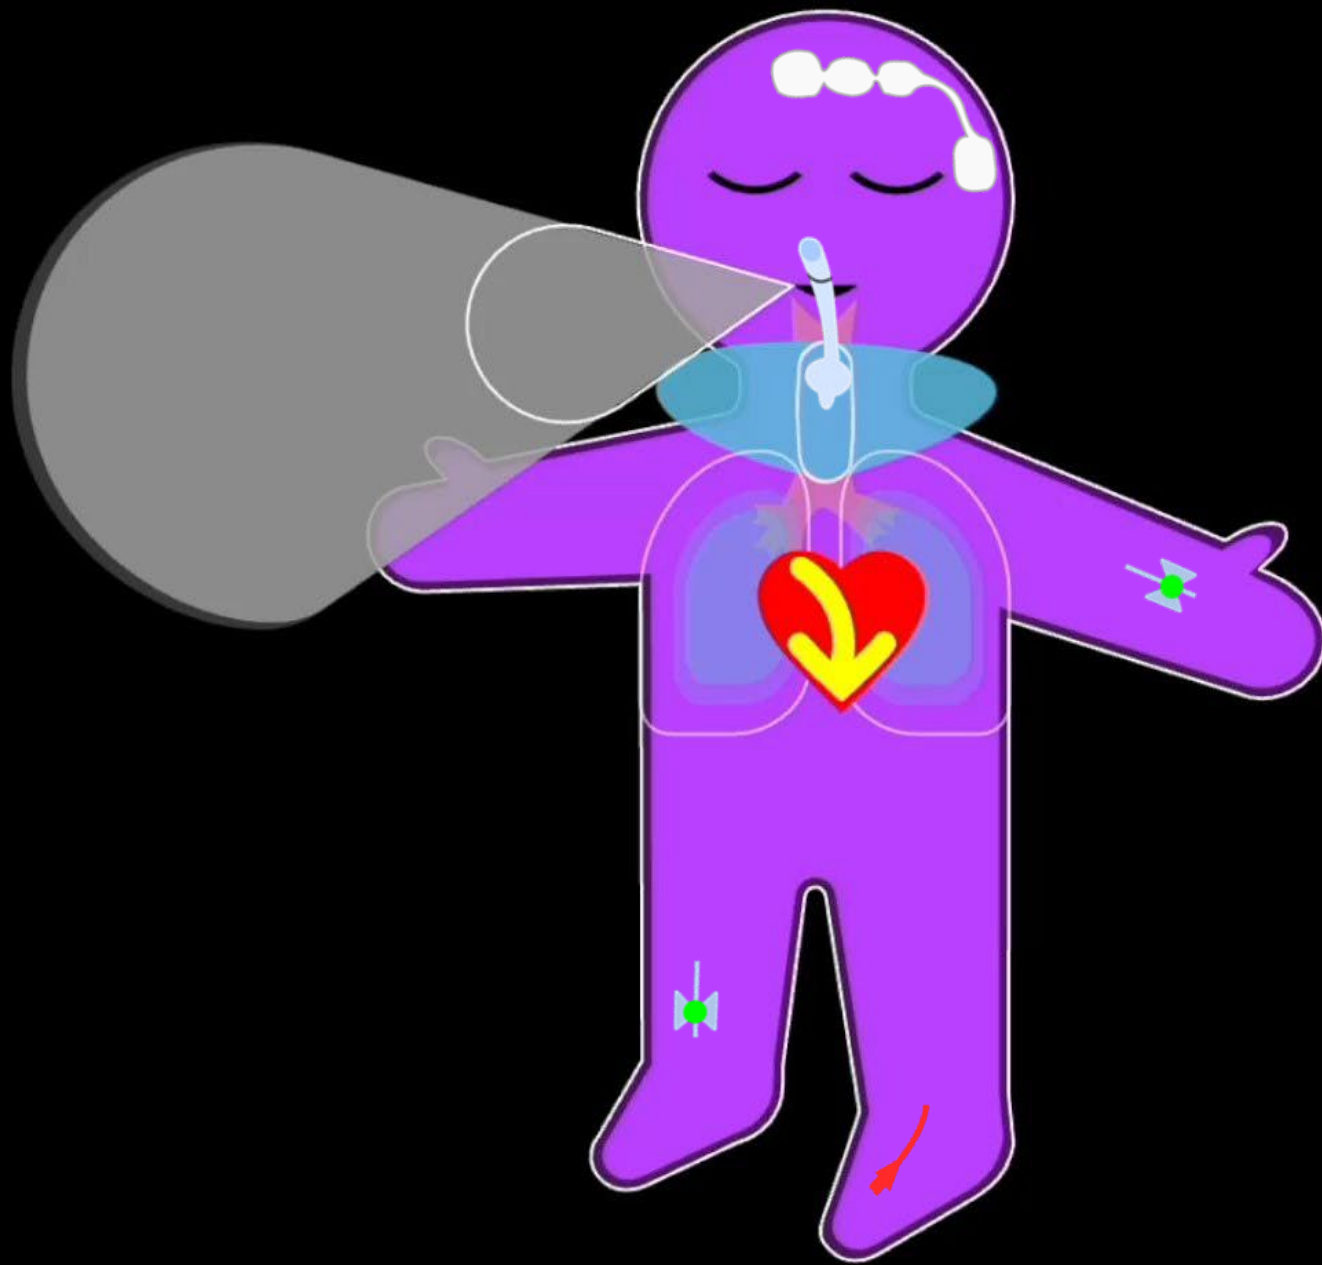

# Case 6

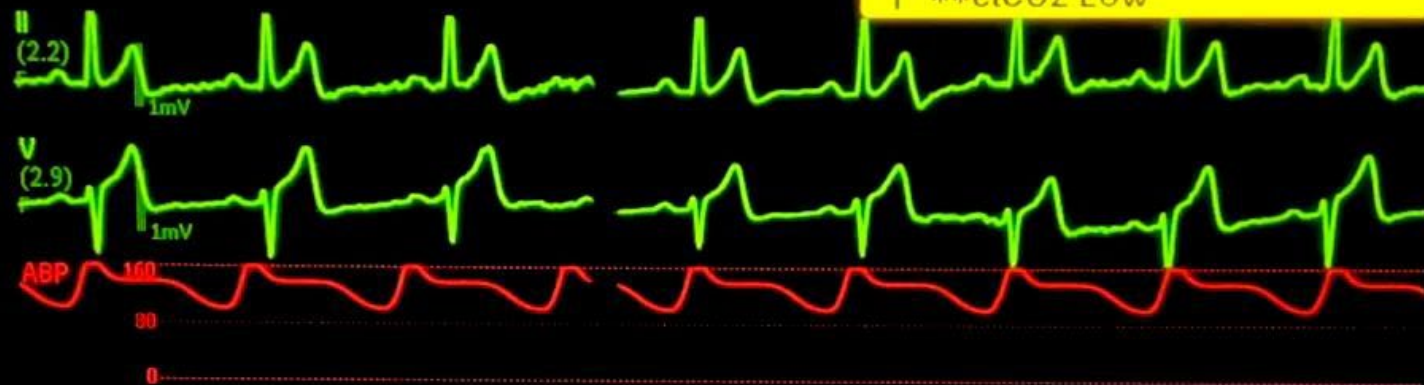

HR

67

ST-I 0.9  
ST-II 0.5  
ST-III 1.0  
ST-aVR 0.2  
ST-aVL 1.2  
ST-aVF 0.4  
ST-V 0.3

ABP 167/100  
(110)

CVP 12/5  
(8)

PIP

20

CO<sub>2</sub>

10

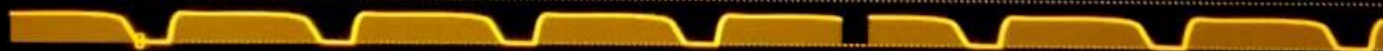etCO<sub>2</sub>

3.2

RRaw

15

TV

900

BIS

50

Insp O<sub>2</sub>

50

ore

37.0

SpO<sub>2</sub>

98

TOFrat

10

| AWR AUFN B                    |                          | 30.5.21 | 1500 | 1700 | 1900 | 2100 | 2300 | 31.5.21 | 100 | 300 | 500 | 700 | 900 | 1100 | 1300 | 1500 | 1700 |
|-------------------------------|--------------------------|---------|------|------|------|------|------|---------|-----|-----|-----|-----|-----|------|------|------|------|
| Catéter venoso periférico     | Prazo derecho            |         |      |      |      |      |      |         |     |     |     |     |     |      |      |      |      |
| Catéter venoso central        | Vena subclavia izquierda |         |      |      |      |      |      |         |     |     |     |     |     |      |      |      |      |
| Catéter arterial              | Arteria radial izquierda |         |      |      |      |      |      |         |     |     |     |     |     |      |      |      |      |
| Tubo                          | Oral                     |         |      |      |      |      |      |         |     |     |     |     |     |      |      |      |      |
| Catéter urinario              |                          |         |      |      |      |      |      |         |     |     |     |     |     |      |      |      |      |
| Sensor de actividad cerebral  |                          |         |      |      |      |      |      |         |     |     |     |     |     |      |      |      |      |
| Sonda de presión intracraneal | Hemisferio izquierdo     |         |      |      |      |      |      |         |     |     |     |     |     |      |      |      |      |

# Case 7



↑ \*\*SpO<sub>2</sub> Low

\*\*\*ABP Low

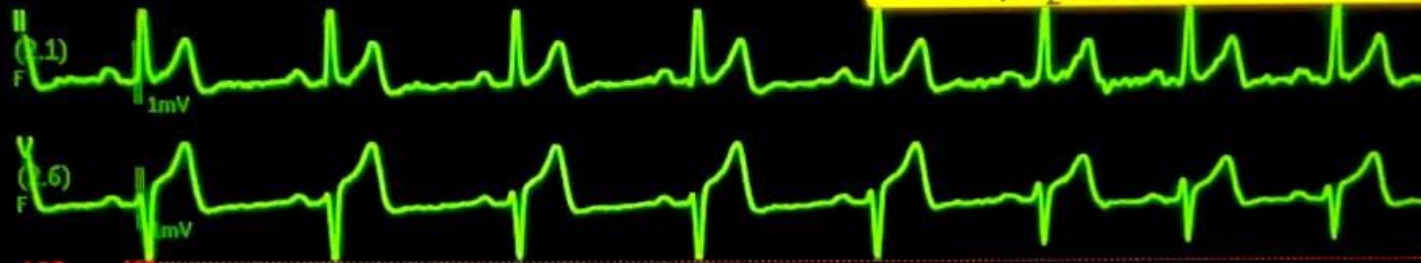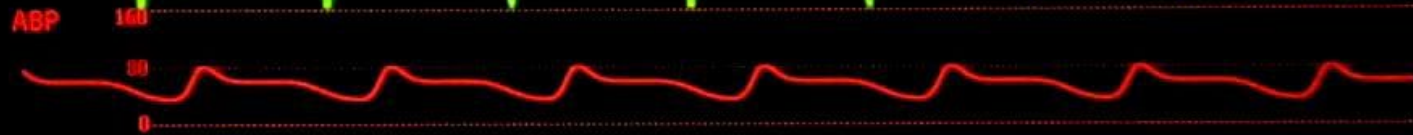ABP 80/35  
(45)

CVP (19)

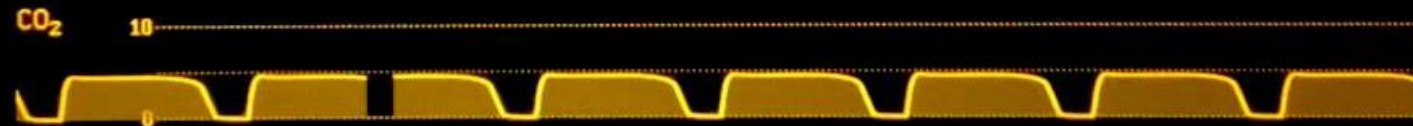

CI 1.0

PIP 22

etCO<sub>2</sub> 4.6

RRaw 15

TV 450

BIS 99

Insp O<sub>2</sub> 50

Tcore 36.9

SpO<sub>2</sub> 88

TOFrat 99

| AWR AUFN B                   |                           | 30.5.21 | 1500 | 1700 | 1900 | 2100 | 2300 | 31.5.21 | 100 | 300 | 500 | 700 | 900 | 1100 | 1300 | 1500 | 1700 |
|------------------------------|---------------------------|---------|------|------|------|------|------|---------|-----|-----|-----|-----|-----|------|------|------|------|
| Catéter venoso central       | Vena jugular int. derecha |         |      |      |      |      |      |         |     |     |     |     |     |      |      |      |      |
| Catéter PiCCO                | Arteria femoral derecha   |         |      |      |      |      |      |         |     |     |     |     |     |      |      |      |      |
| Tubo                         | Oral                      |         |      |      |      |      |      |         |     |     |     |     |     |      |      |      |      |
| Catéter urinario             |                           |         |      |      |      |      |      |         |     |     |     |     |     |      |      |      |      |
| Sensor de actividad cerebral | Hemisferio izquierdo      |         |      |      |      |      |      |         |     |     |     |     |     |      |      |      |      |

# Case 8



↑ \*\*Tcore High

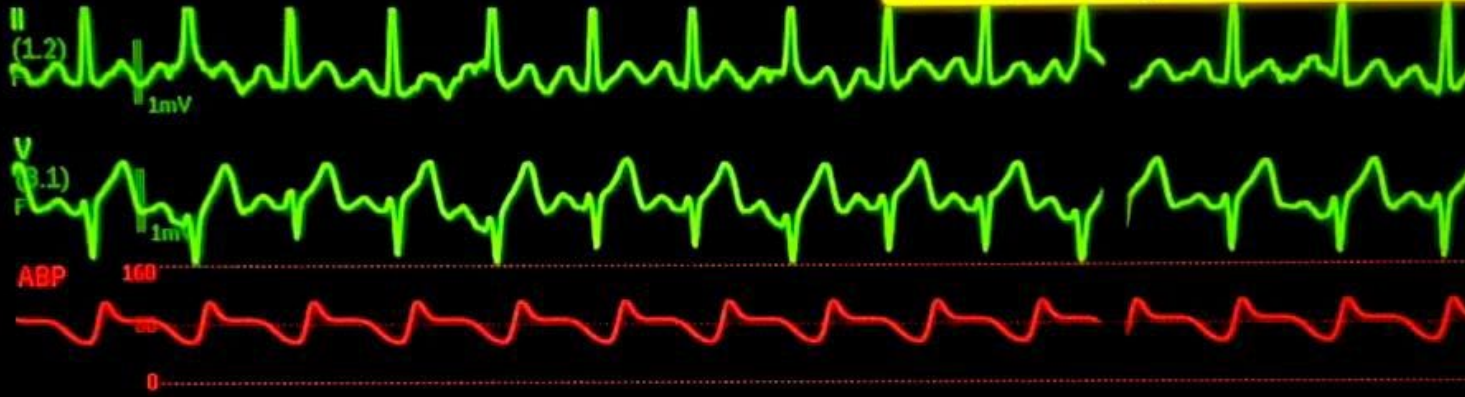HR  
109

|        |     |
|--------|-----|
| ST-I   | 0.9 |
| ST-II  | 0.5 |
| ST-III | 1.0 |
| ST-aVR | 0.2 |
| ST-aVL | 1.2 |
| ST-aVF | 0.4 |
| ST-V   | 0.3 |

ABP 110/55  
(65)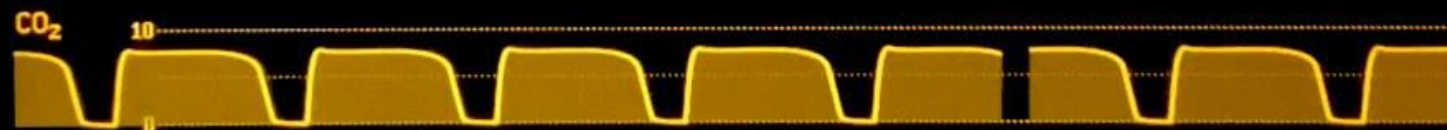etCO<sub>2</sub>  
7.8

|      |     |
|------|-----|
| PIP  | 24  |
| RRaw | 15  |
| TV   | 500 |

BIS  
43Insp O<sub>2</sub>  
25Tcore  
39.9SpO<sub>2</sub>  
98TOF  
40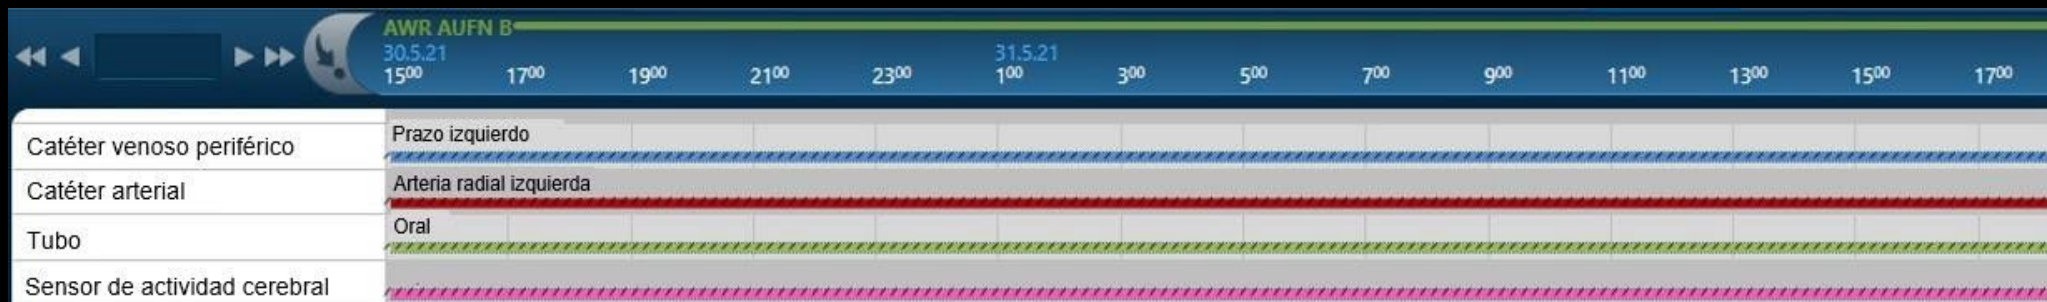

# Case 9

\*\*Tcore Low

↑ \*\*\* Extreme Tachy

HR

110

|        |      |
|--------|------|
| ST-I   | -3.5 |
| ST-II  | -2.8 |
| ST-III | 1.2  |
| ST-aVR | 0.6  |
| ST-aVL | 1.7  |
| ST-aVF | 2.4  |
| ST-V   | 1.9  |

ABP

120/60  
(70)

CVP

8/4  
(7)

CI

6.8

PIP

RRaw

30

TV

BIS

99

Insp O2

Tcore

35.3

SpO<sub>2</sub>

99

TOFrat

99

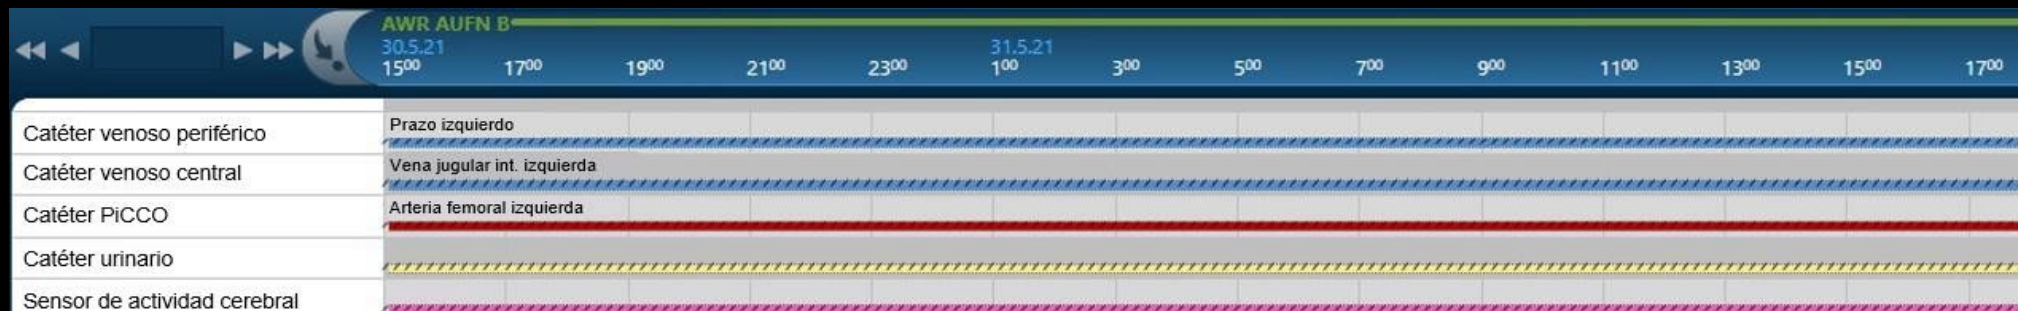

# Case 10



↑ \*\*etCO<sub>2</sub> High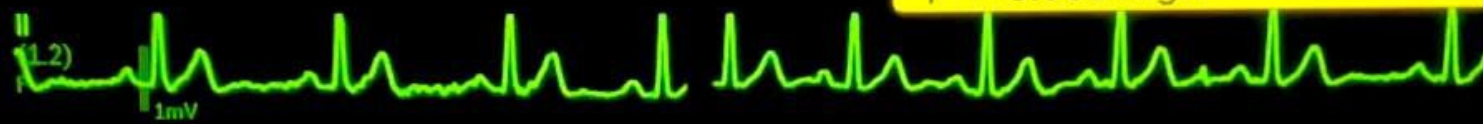

HR

81

ST-I 0.9  
ST-II 0.5  
ST-III 1.0  
ST-aVR 0.2  
ST-aVL 1.2  
ST-aVF 0.4  
ST-V 0.3

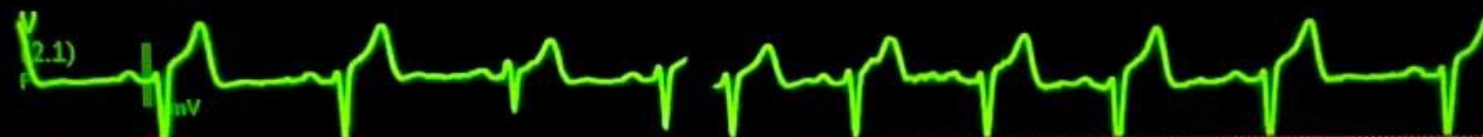

ABP

160

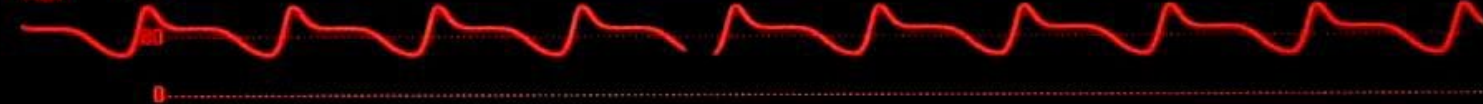

ABP

120/55  
(65)CO<sub>2</sub>

10

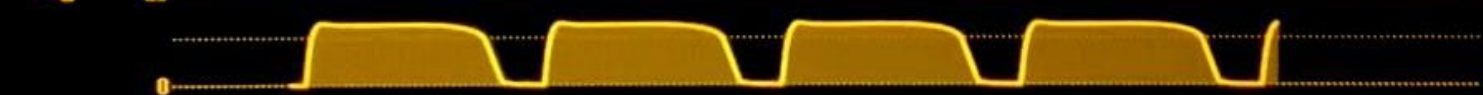etCO<sub>2</sub>

6.5

PIP

45

RRaw

12

TV

250

BIS

40

Insp O<sub>2</sub>

100

Tcore

37.0

SpO<sub>2</sub>

89

TOFrat

99

AWR AUFN B

12.6.21

18<sup>00</sup>20<sup>00</sup>22<sup>00</sup>

13.6.21

0<sup>00</sup>2<sup>00</sup>4<sup>00</sup>6<sup>00</sup>8<sup>00</sup>10<sup>00</sup>12<sup>00</sup>14<sup>00</sup>16<sup>00</sup>18<sup>00</sup>20<sup>00</sup>

Catéter venoso periférico

Prazo izquierdo

Catéter arterial

Arteria dorsal pierna izquierda

Tubo

Oral

Sensor de actividad cerebral

**Thank you so much for your help!**
